# Supplementary material
Source: PubMed Central journal article supplement (PMC1533974)

# Supplemental Figure 1

Fuchs, Hause, Schuchardt and Steinberg, 2006

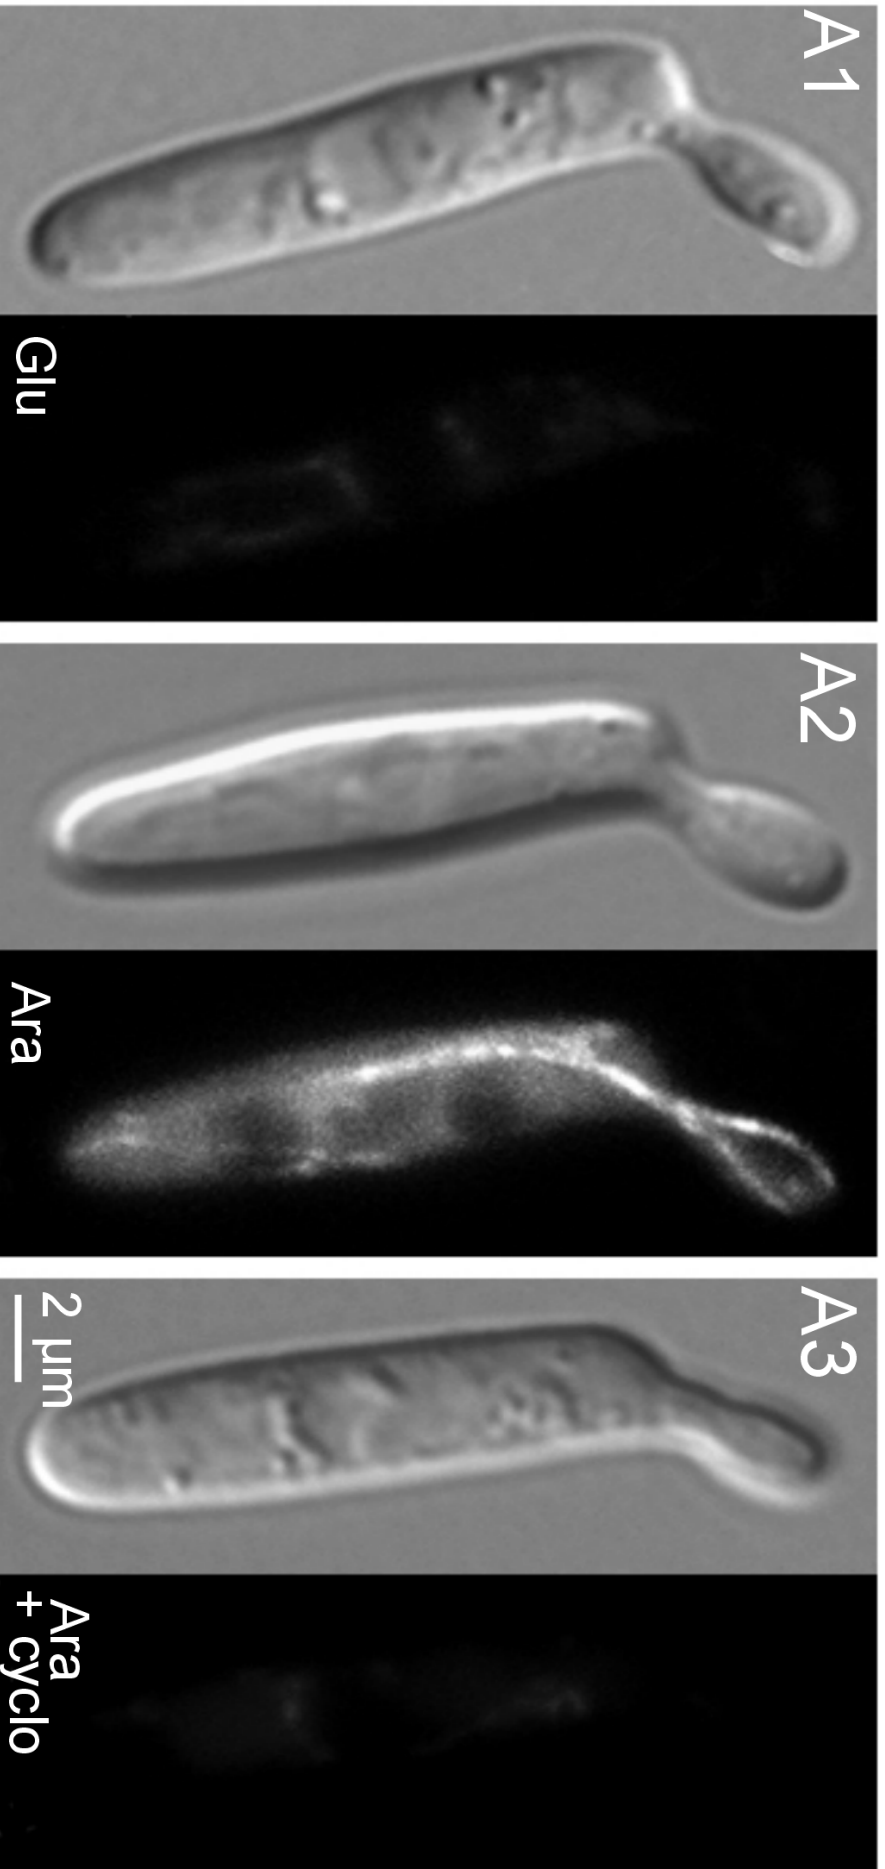

Supplement: plntcell_tpc.105.039388_1.pdf [file plntcell_tpc.105.039388_1.pdf]

# Supplemental Figure 2

## Fuchs, Hause, Schuchardt and Steinberg, 2006

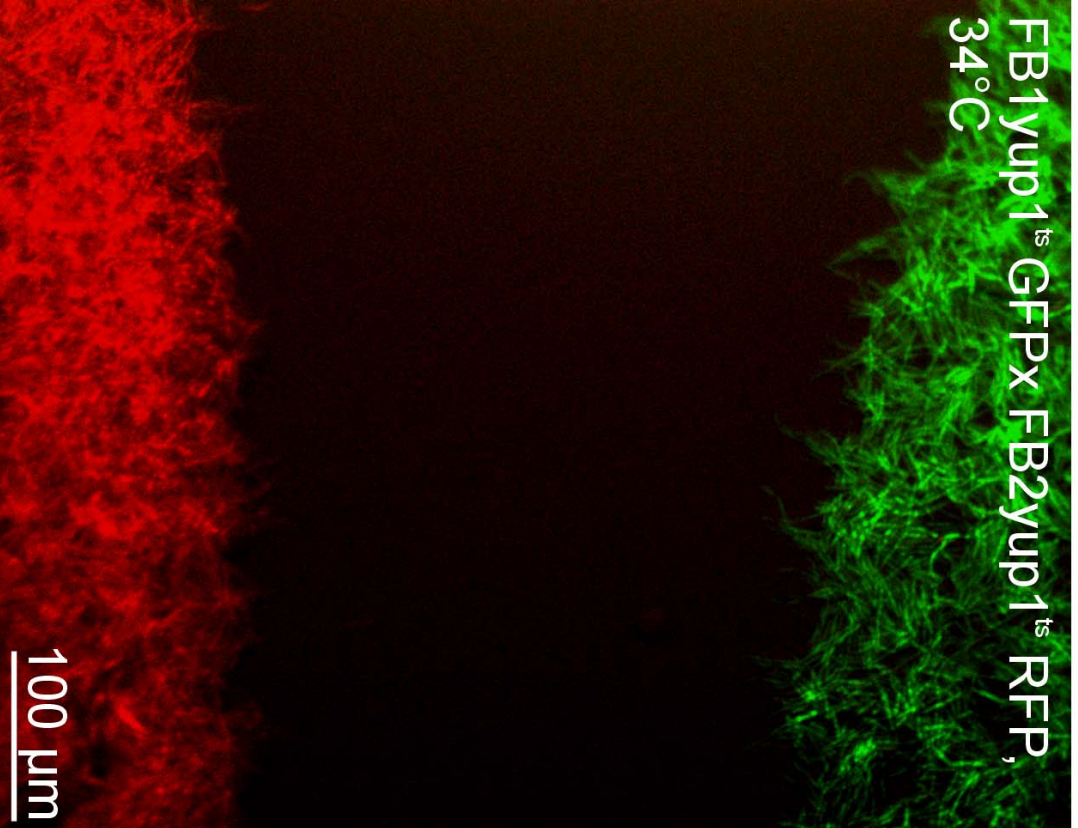

Supplement: plntcell_tpc.105.039388_2.pdf [file plntcell_tpc.105.039388_2.pdf]

# Supplemental Figure 3

Fuchs, Hause, Schuchardt and Steinberg, 2006

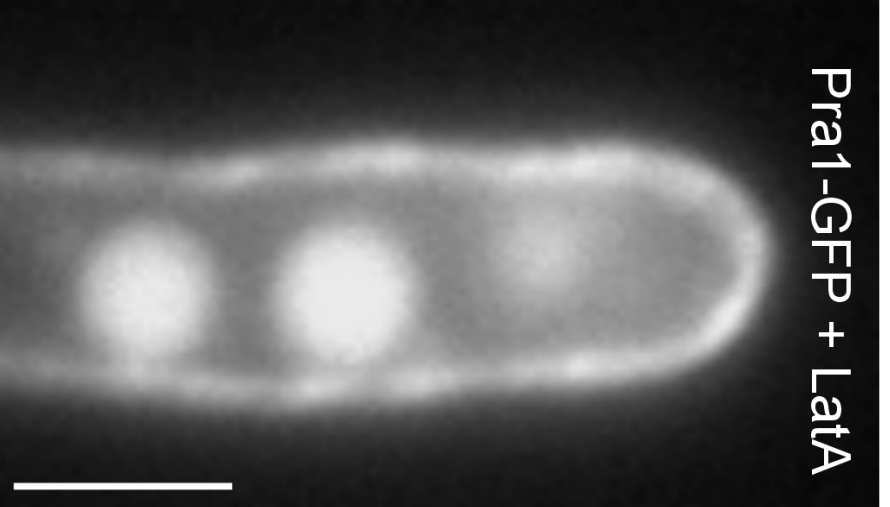

Supplement: plntcell_tpc.105.039388_3.pdf [file plntcell_tpc.105.039388_3.pdf]
